# Supplementary material for: Non-stoichiometric molybdenum sulfide clusters and their reactions with the hydrogen molecule
Source: Royal Society of Chemistry journal article supplement (doi:10.1039/d0cp04457a), 2020-12-09
Supplement: d0cp04457a1.pdf [file d0cp04457a1.pdf]

## Supplementary Information for:

# Non-stoichiometric Molybdenum Sulfide Clusters and Their Reactions with Hydrogen Molecule

Yan Chen, Jia-Jun Deng\*, Wen-Wen Yao, Joseph Israel Gurti, Wei Li, Wen-Jie Wang, Jian-Xi Yao,  
and Xun-Lei Ding\*

\*Authors to whom correspondence should be addressed.

Emails: dingxl@ncepu.edu.cn; djiaj@ncepu.edu.cn

### Table of Contents

|                                                                                                                                                                                                                     |       |
|---------------------------------------------------------------------------------------------------------------------------------------------------------------------------------------------------------------------|-------|
| <b>Table S1.</b> The distance between Mo-Mo atoms in the most stable structure of $\text{Mo}_x\text{S}_y$ clusters.                                                                                                 | (S2)  |
| <b>Table S2.</b> Natural bond orbital analyses for $\text{H}_2 \dots \text{Mo}_x\text{S}_y$ clusters.                                                                                                               | (S3)  |
| <b>Figure S1.</b> Calculated low-lying isomers of $\text{Mo}_2\text{S}_y$ ( $y = 2-8$ ).                                                                                                                            | (S4)  |
| <b>Figure S2.</b> Calculated low-lying isomers of $\text{Mo}_3\text{S}_y$ ( $y = 3-9$ ).                                                                                                                            | (S5)  |
| <b>Figure S3.</b> Calculated low-lying isomers of $\text{Mo}_4\text{S}_y$ ( $y = 4-10$ ).                                                                                                                           | (S6)  |
| <b>Figure S4.</b> Relationship between adsorption energy ( $E_{\text{ad}}$ ) and electron transfer ( $Q$ ) for $\text{H}_2 \dots \text{Mo}_x\text{S}_y$ clusters.                                                   | (S7)  |
| <b>Figure S5.</b> Relationship between adsorption energy ( $E_{\text{ad}}$ ) and H-Mo bond length ( $d_{\text{H-Mo}}$ ) for $\text{H}_2 \dots \text{Mo}_x\text{S}_y$ clusters.                                      | (S8)  |
| <b>Figure S6.</b> Relationship between adsorption energy ( $E_{\text{ad}}$ ) and H-H bond length ( $d_{\text{H-H}}$ ) for $\text{H}_2 \dots \text{Mo}_x\text{S}_y$ clusters.                                        | (S9)  |
| <b>Figure S7.</b> Relationship between adsorption energy ( $E_{\text{ad}}$ ) and symmetric H <sub>2</sub> -Mo vibration ( $\nu_{\text{s}}(\text{Mo-H}_2)$ ) for $\text{H}_2 \dots \text{Mo}_x\text{S}_y$ clusters.  | (S10) |
| <b>Figure S8.</b> Relationship between adsorption energy ( $E_{\text{ad}}$ ) and asymmetric H <sub>2</sub> -Mo vibration ( $\nu_{\text{a}}(\text{Mo-H}_2)$ ) for $\text{H}_2 \dots \text{Mo}_x\text{S}_y$ clusters. | (S11) |
| <b>Figure S9.</b> Relationship between adsorption energy ( $E_{\text{ad}}$ ) and H-H vibration ( $\nu(\text{H-H})$ ) for $\text{H}_2 \dots \text{Mo}_x\text{S}_y$ clusters.                                         | (S12) |
| <b>Calculations on two-dimensional molybdenum sulfide monolayer with grid structure</b>                                                                                                                             | (S13) |

**Table S1.** Calculated distance between Mo-Mo atoms ( $d_i$ ) in the most stable structure of  $\text{Mo}_x\text{S}_y$  clusters.  $\bar{d}$  is the averaged value of  $d_i$  (except  $d_i > 380$  pm) for each cluster. All values are in picometer.

| $\text{Mo}_2\text{S}_y$ |       | $\text{Mo}_3\text{S}_y$ |       |       |       |       | $\bar{d}$ |
|-------------------------|-------|-------------------------|-------|-------|-------|-------|-----------|
| $y$                     | $d_1$ | $y$                     | $d_1$ | $d_2$ | $d_3$ |       |           |
| 2                       | 210   | 3                       | 225   | 225   | 281   | 244   |           |
| 3                       | 204   | 4                       | 232   | 232   | 261   | 242   |           |
| 4                       | 265   | 5                       | 227   | 269   | 269   | 255   |           |
| 5                       | 279   | 6                       | 269   | 269   | 279   | 273   |           |
| 6                       | 299   | 7                       | 276   | 294   | 294   | 288   |           |
| 7                       | 319   | 8                       | 297   | 297   | 409   | 297   |           |
| 8                       | 276   | 9                       | 343   | 343   | 354   | 347   |           |
| $\text{Mo}_4\text{S}_y$ |       |                         |       |       |       |       |           |
| $y$                     | $d_1$ | $d_2$                   | $d_3$ | $d_4$ | $d_5$ | $d_6$ | $\bar{d}$ |
| 4                       | 225   | 249                     | 256   | 256   | 256   | 257   | 250       |
| 5                       | 248   | 255                     | 255   | 255   | 255   | 259   | 254       |
| 6                       | 257   | 257                     | 257   | 257   | 257   | 257   | 257       |
| 7                       | 257   | 257                     | 257   | 257   | 257   | 258   | 257       |
| 8                       | 278   | 280                     | 280   | 280   | 280   | 487   | 280       |
| 9                       | 274   | 274                     | 315   | 315   | 331   | 377   | 315       |
| 10                      | 287   | 287                     | 322   | 322   | 325   | 489   | 308       |

**Table S2.** Natural bond orbital analyses for  $H_2 \dots Mo_x S_y$  clusters.  $\delta$  is the occupancy of NBOs,  $\Delta E^2$  (kcal mol<sup>-1</sup>) is the second-order perturbation energy, BD is the 2-center (c) bond, BD\* is the 2c anti-bond, LP is the lone pair 1c valence orbital, LP\* is the empty 1c valence orbital, RY is the 1c Rydberg-type orbital, and LV is the energy-sorted lone vacant orbital. For triplet systems, two lines are listed for spin up and down, respectively. All data are calculated with B3LYP-D3/ma-def2-TZVP, except those in the parentheses with def2-TZVP. Results of H<sub>2</sub>-23a and H<sub>2</sub>-25a indicate that diffuse functions have little effect here.

|                      | H <sub>2</sub> → Cluster |                  |           |                  |                  | Cluster → H <sub>2</sub> |                  |          |                  |                  |
|----------------------|--------------------------|------------------|-----------|------------------|------------------|--------------------------|------------------|----------|------------------|------------------|
|                      | Donor                    | $\delta$         | Acceptor  | $\delta$         | $\Delta E^2$     | Donor                    | $\delta$         | Acceptor | $\delta$         | $\Delta E^2$     |
| H <sub>2</sub> -22a  | BD H-H                   | 0.918            | BD* Mo-S  | 0.117            | 21.31            | LP Mo                    | 0.948            | BD* H-H  | 0.054            | 7.71             |
|                      | BD H-H                   | 0.920            | BD* Mo-S  | 0.109            | 20.87            | BD Mo-S                  | 0.867            | BD* H-H  | 0.018            | 1.47             |
| H <sub>2</sub> -23a  | BD H-H                   | 1.821<br>(1.821) | BD* Mo-S  | 0.237<br>(0.235) | 37.19<br>(37.87) | BD Mo-S                  | 1.911<br>(1.912) | BD* H-H  | 0.051<br>(0.052) | 3.60<br>(3.57)   |
| H <sub>2</sub> -24a  | BD H-H                   | (0.880)          | BD* Mo-S  | (0.170)          | (19.15)          | LP Mo                    | (0.897)          | BD* H-H  | (0.046)          | (7.48)           |
|                      | BD H-H                   | (0.878)          | BD* Mo-S  | (0.099)          | (22.85)          | LP Mo                    | (0.745)          | BD* H-H  | (0.022)          | (8.36)           |
| H <sub>2</sub> -25a  | BD H-H                   | 1.751<br>(1.752) | BD* Mo-S  | 0.221<br>(0.221) | 48.34<br>(48.27) | LP Mo                    | 1.638<br>(1.638) | BD* H-H  | 0.064<br>(0.065) | 17.07<br>(17.30) |
| H <sub>2</sub> -33a  | BD H-H                   | 0.880            | LV Mo     | 0.218            | 5.50             | LP Mo                    | 0.966            | BD* H-H  | 0.025            | 3.17             |
|                      | BD H-H                   | 0.878            | LV Mo     | 0.156            | 23.13            | BD Mo-S                  | 0.911            | RY H     | 0.001            | 0.86             |
| H <sub>2</sub> -33b  | BD H-H                   | 0.920            | BD* Mo-S  | 0.246            | 21.67            | LP Mo                    | 0.658            | BD* H-H  | 0.084            | 16.43            |
|                      | BD H-H                   | 0.918            | BD* Mo-S  | 0.141            | 20.06            | LP Mo                    | 0.559            | BD* H-H  | 0.063            | 24.27            |
| H <sub>2</sub> -33b' | BD H-H                   | 0.921            | BD* Mo-Mo | 0.292            | 12.24            | LP Mo                    | 0.967            | BD* H-H  | 0.036            | 5.02             |
|                      | BD H-H                   | 0.922            | BD* Mo-Mo | 0.285            | 12.76            | BD Mo-Mo                 | 0.841            | RY H     | 0.000            | 1.11             |
| H <sub>2</sub> -34a  | BD H-H                   | 0.907            | RY Mo     | 0.094            | 9.67             | LP Mo                    | 0.340            | RY H     | 0.004            | 2.19             |
|                      | BD H-H                   | 0.902            | LV Mo     | 0.209            | 17.37            | LP Mo                    | 0.277            | RY H     | 0.002            | 6.15             |
| H <sub>2</sub> -35a  | BD H-H                   | 1.790            | BD* Mo-S  | 0.316            | 35.59            | LP Mo                    | 1.023            | RY H     | 0.003            | 16.59            |
| H <sub>2</sub> -36a  | BD H-H                   | 1.759            | BD* Mo-S  | 0.257            | 50.75            | LP Mo                    | 1.616            | BD* H-H  | 0.061            | 19.67            |
| H <sub>2</sub> -44a  | BD H-H                   | 0.922            | BD* Mo-Mo | 0.281            | 6.27             | BD Mo-Mo                 | 0.759            | RY H     | 0.002            | 17.34            |
|                      | BD H-H                   | 0.921            | BD* Mo-Mo | 0.163            | 8.26             | BD Mo-Mo                 | 0.747            | RY H     | 0.002            | 7.77             |
| H <sub>2</sub> -45a  | BD H-H                   | 1.845            | BD* Mo-Mo | 0.360            | 19.24            | BD Mo-Mo                 | 1.739            | BD* H-H  | 0.009            | 2.87             |
| H <sub>2</sub> -45a' | BD H-H                   | 1.845            | LV Mo     | 0.874            | 28.84            | LP Mo                    | 1.448            | BD* H-H  | 0.009            | 4.36             |
| H <sub>2</sub> -46a  | BD H-H                   | 1.846            | BD* Mo-Mo | 0.352            | 13.51            | BD Mo-Mo                 | 1.502            | RY H     | 0.003            | 5.69             |
| H <sub>2</sub> -47a  | BD H-H                   | 1.849            | BD* Mo-Mo | 0.377            | 31.47            | RY S                     | 0.882            | RY H     | 0.005            | 13.98            |
| H <sub>2</sub> -47a' | BD H-H                   | 1.775            | BD* Mo-Mo | 0.452            | 12.84            | RY S                     | 0.975            | RY H     | 0.003            | 13.97            |
| H <sub>2</sub> -48a  | BD H-H                   | 1.764            | BD* Mo-S  | 0.301            | 53.23            | RY Mo                    | 0.890            | RY H     | 0.004            | 21.21            |

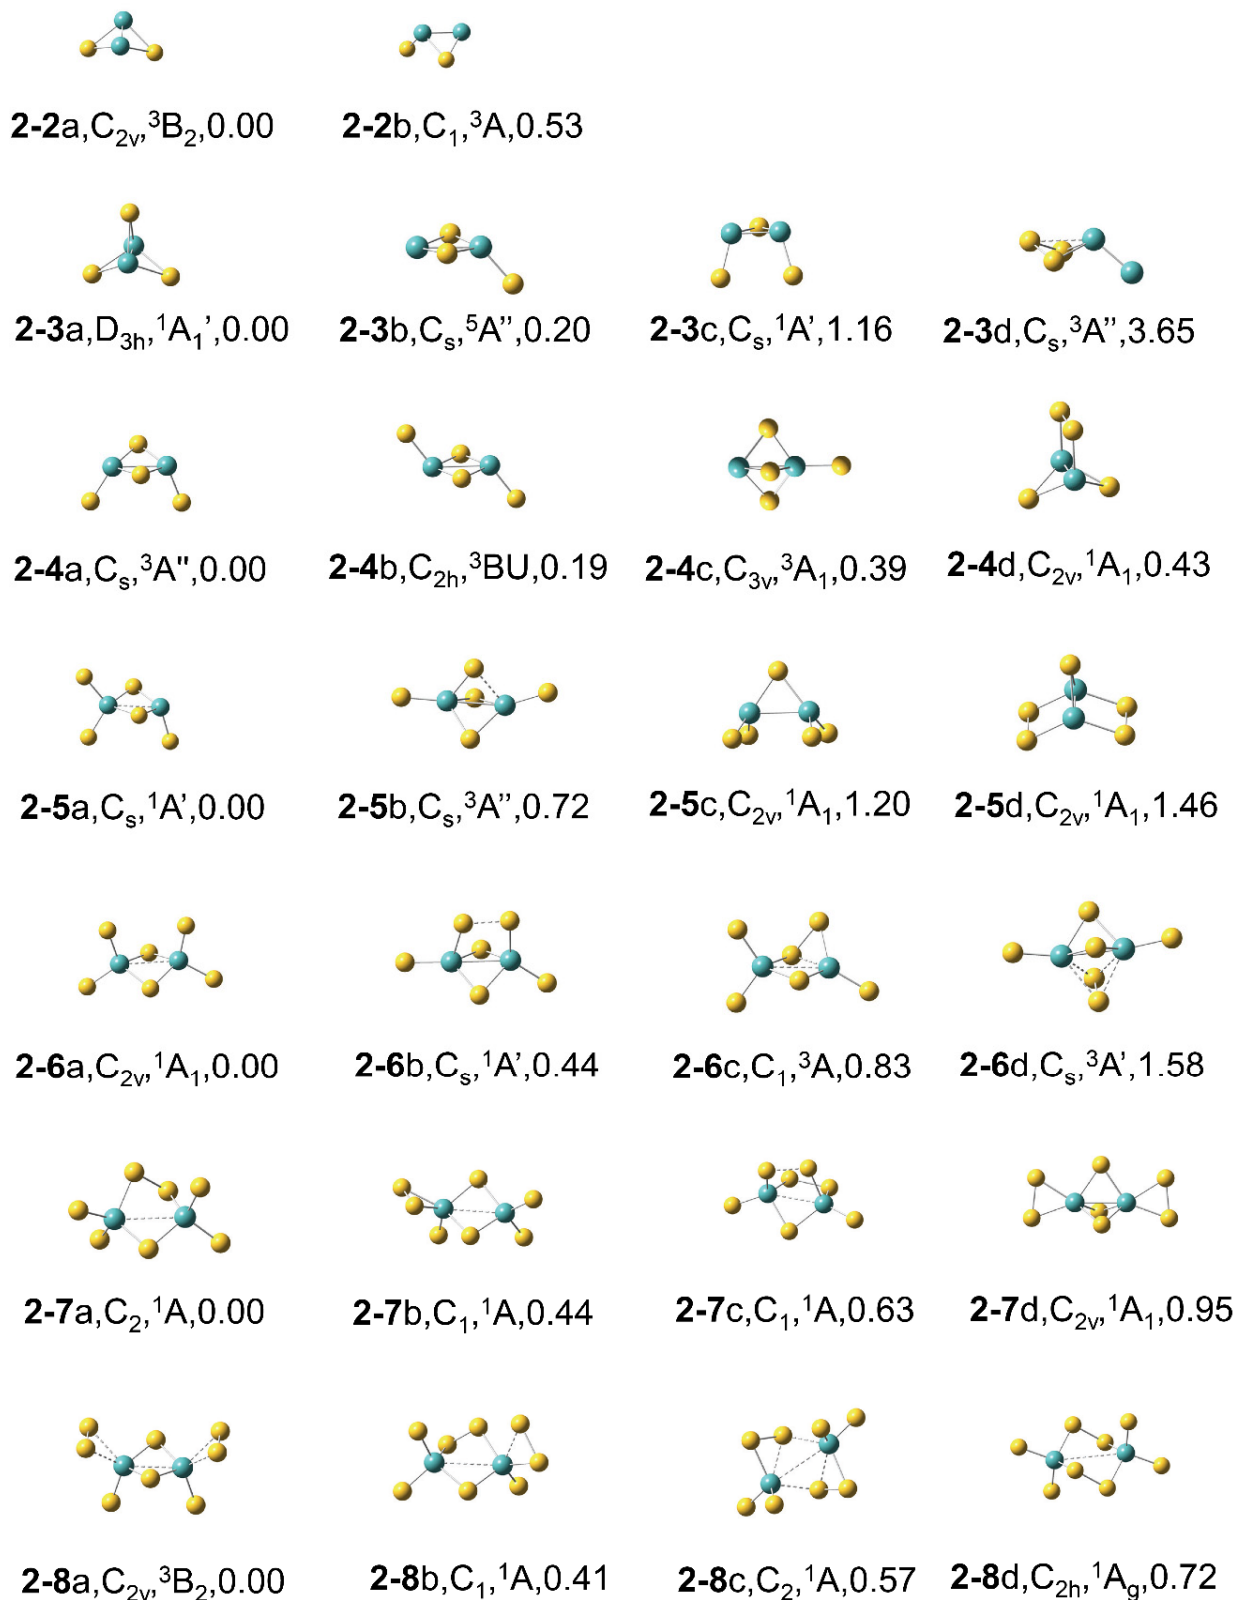

**Figure S1.** Calculated low-lying isomers of  $Mo_2S_y$  ( $y = 2-8$ ). Dashed lines denote Mo-Mo bonds of 275-380 pm, Mo-S bonds of 244-275 pm, or S-S bonds of 214-237 pm. The symmetry, electronic state, and relative energy (in eV) with respect to the ground state are listed below each structure.

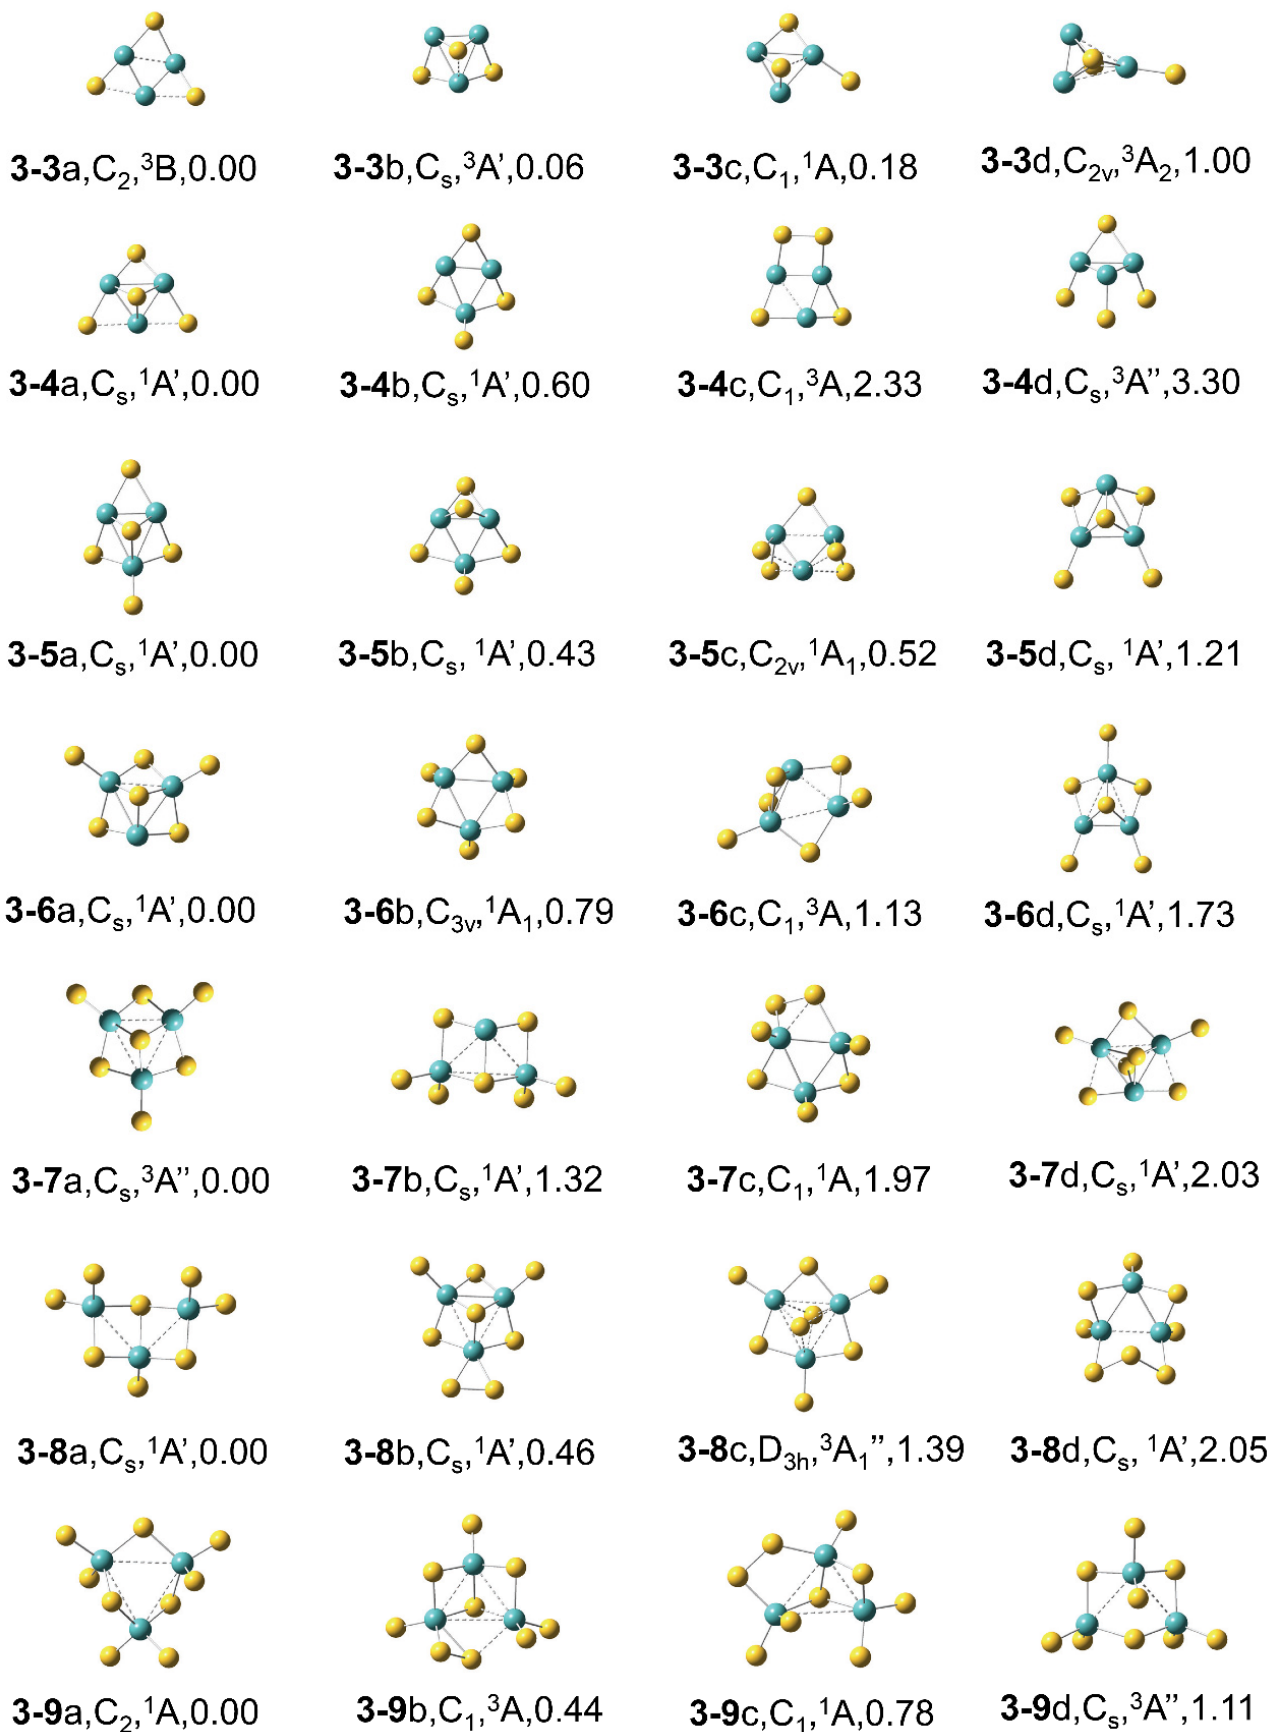

**Figure S2.** Calculated low-lying isomers of  $Mo_3S_y$  ( $y = 3-9$ ). See the caption of Figure S1 for more details.

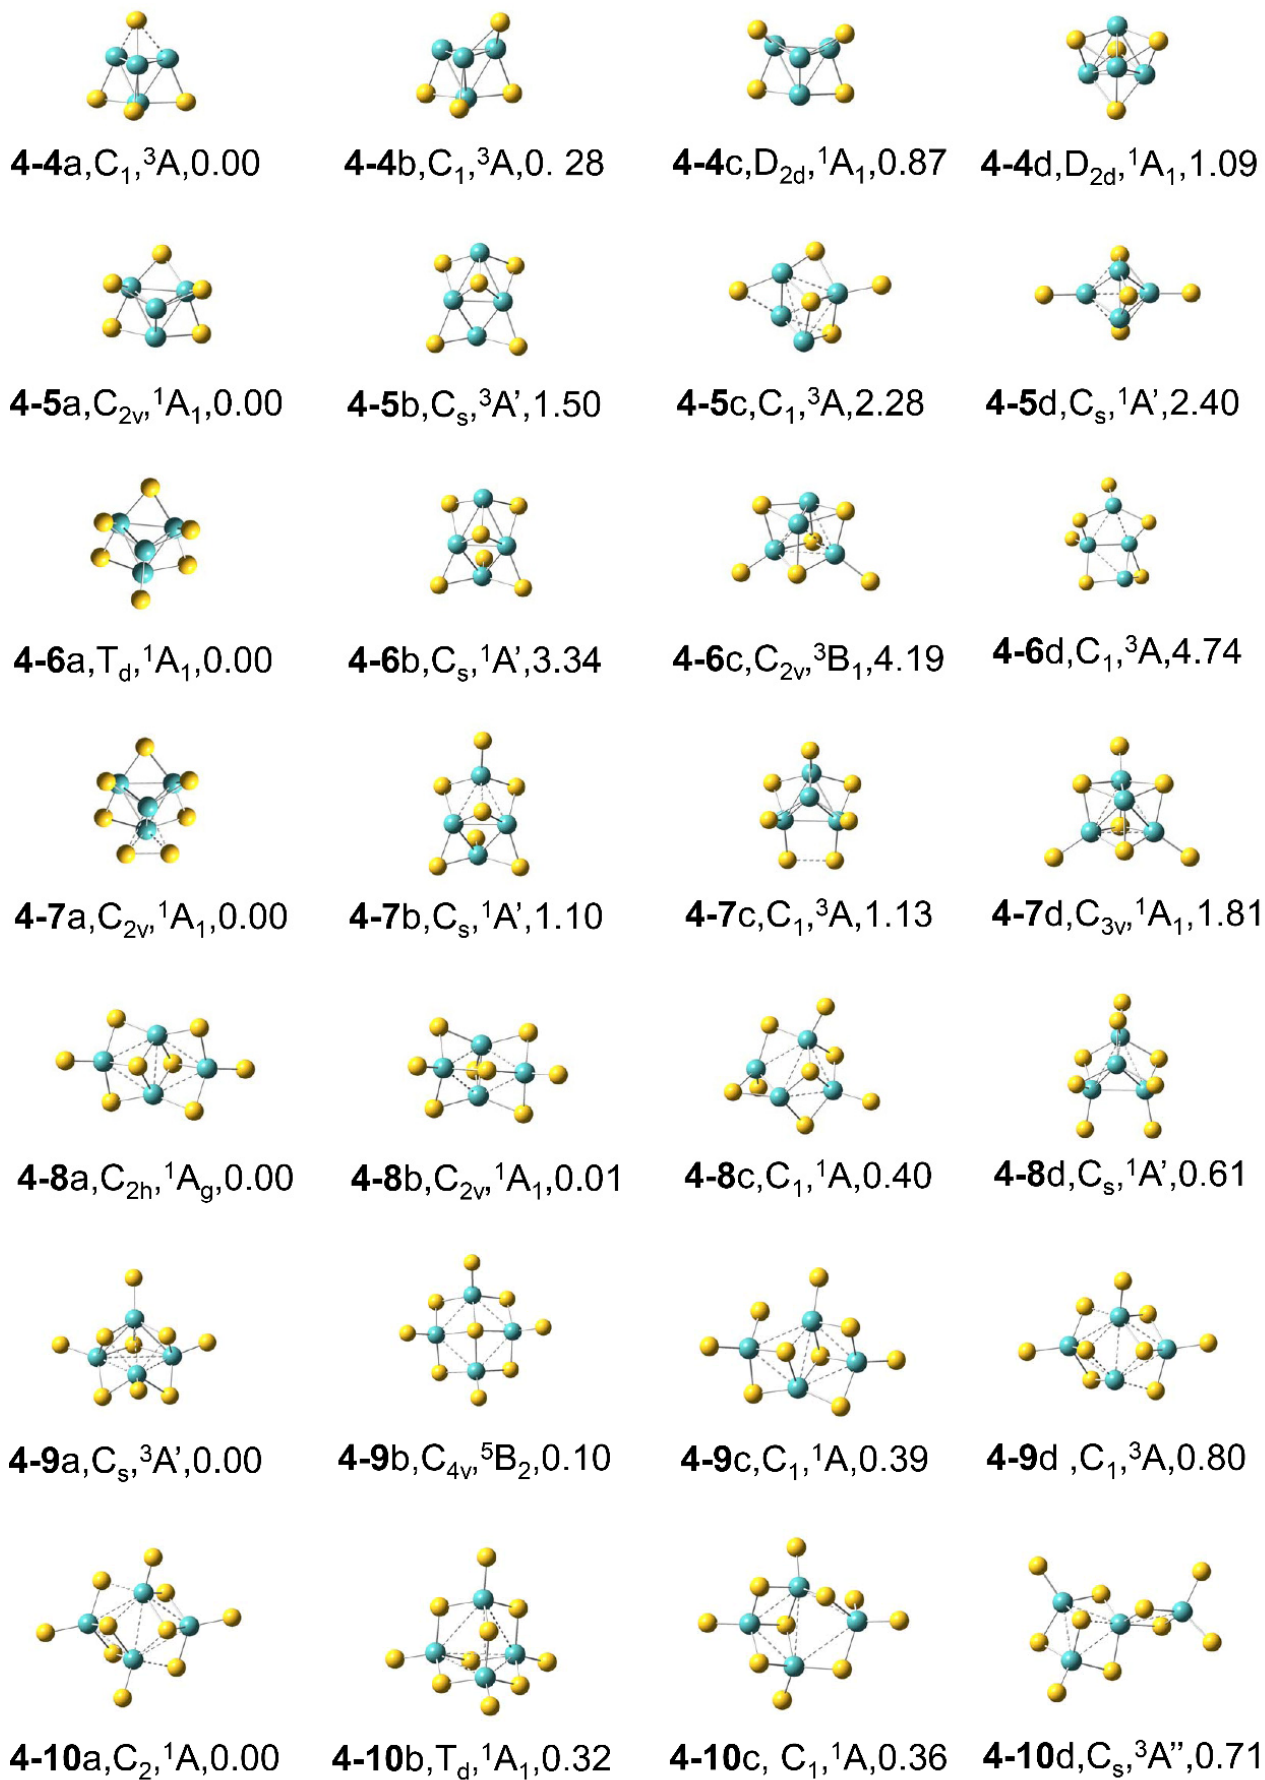

**Figure S3.** Calculated low-lying isomers of  $Mo_4S_y$  ( $y = 4-10$ ). See the caption of Figure S1 for more details.

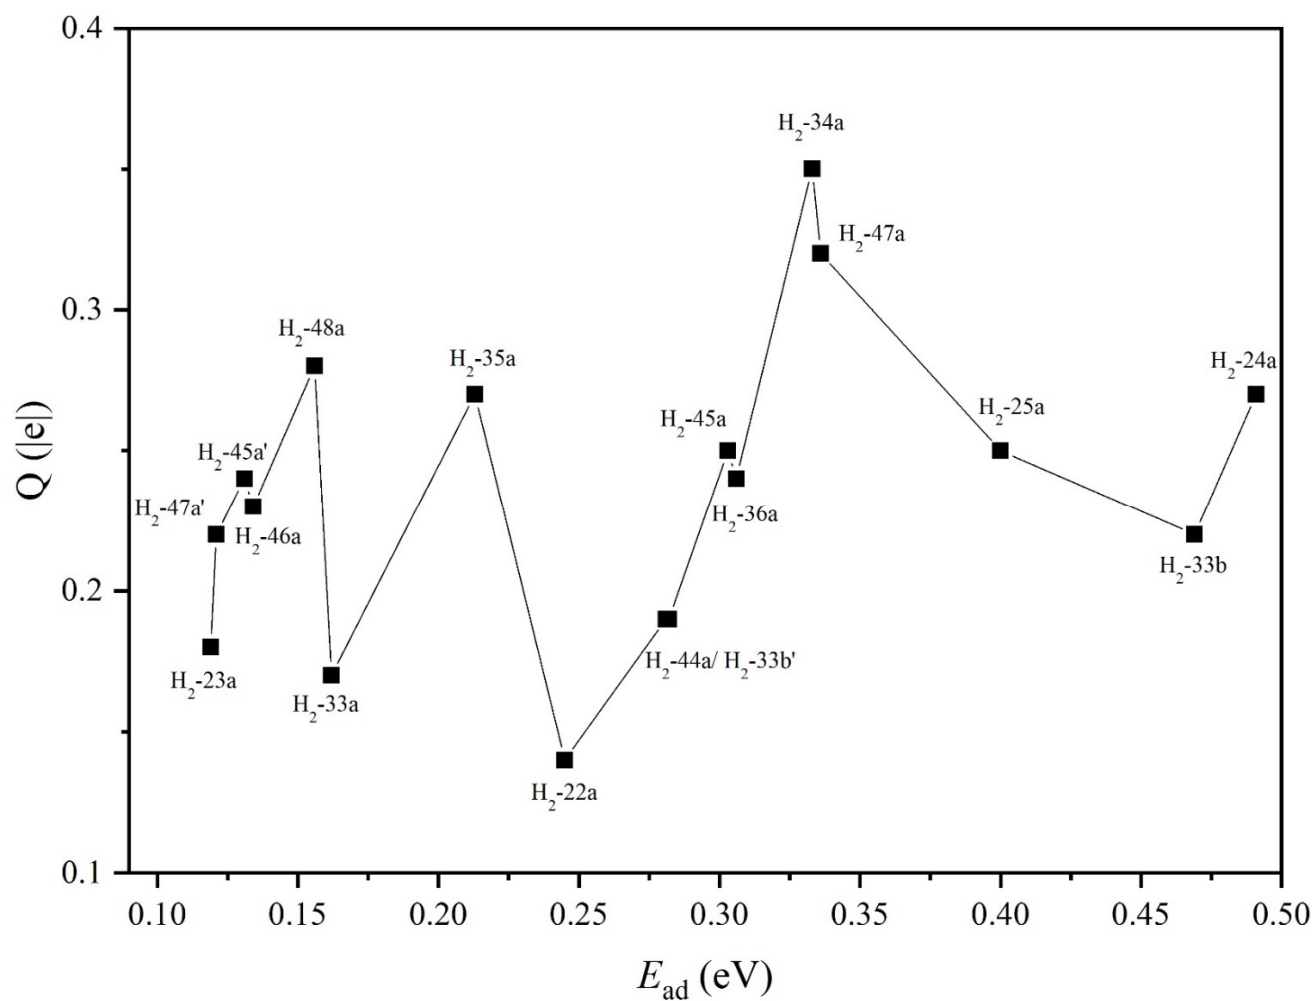

**Figure S4.** Relationship between adsorption energy ( $E_{ad}$ ) and electron transfer ( $Q$ ) for  $H_2 \dots Mo_x S_y$  clusters.

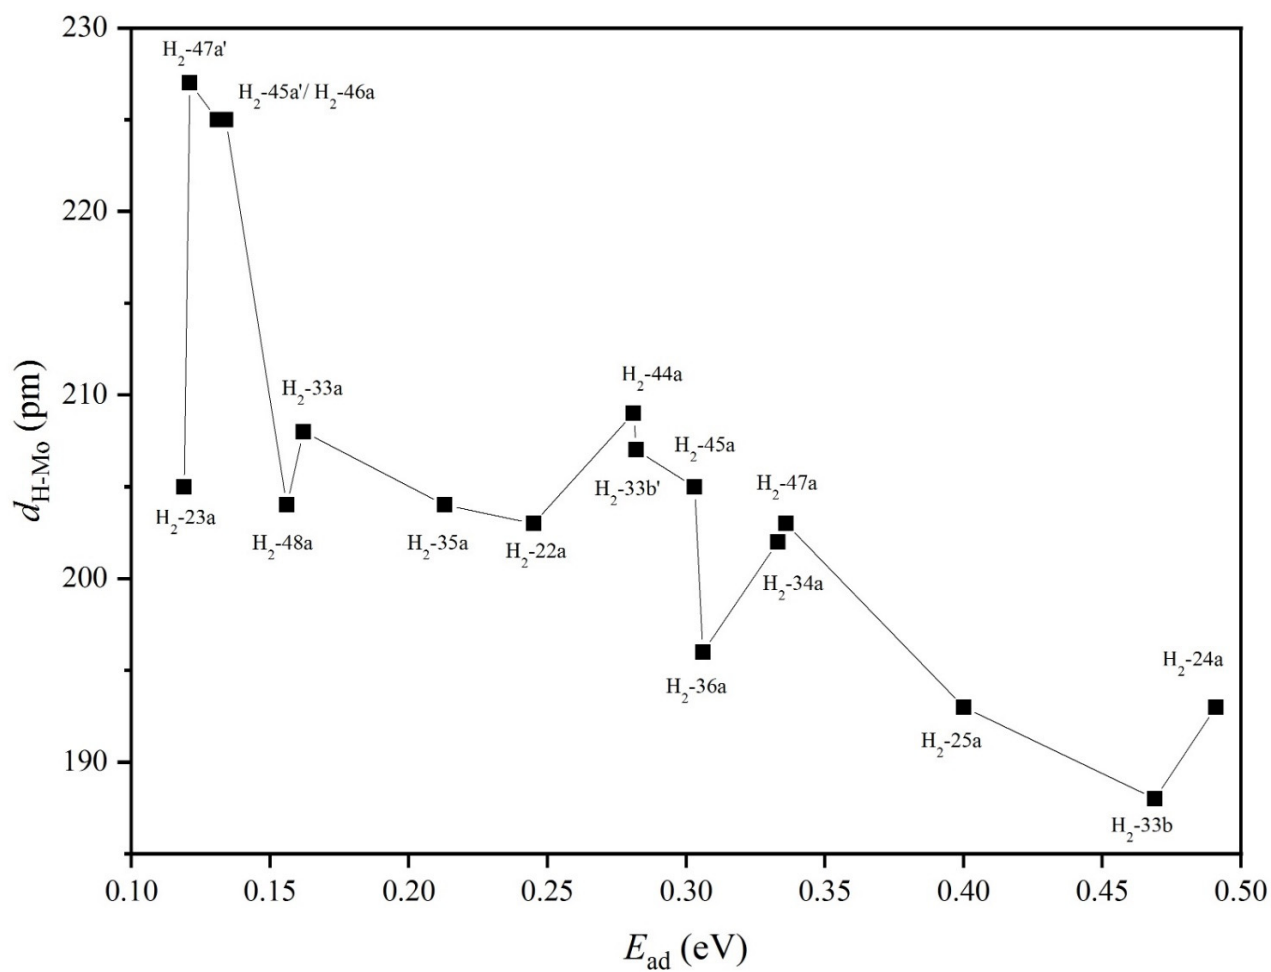

**Figure S5.** Relationship between adsorption energy ( $E_{ad}$ ) and H-Mo bond length ( $d_{H-Mo}$ ) for H<sub>2</sub>...Mo<sub>x</sub>S<sub>y</sub> clusters.



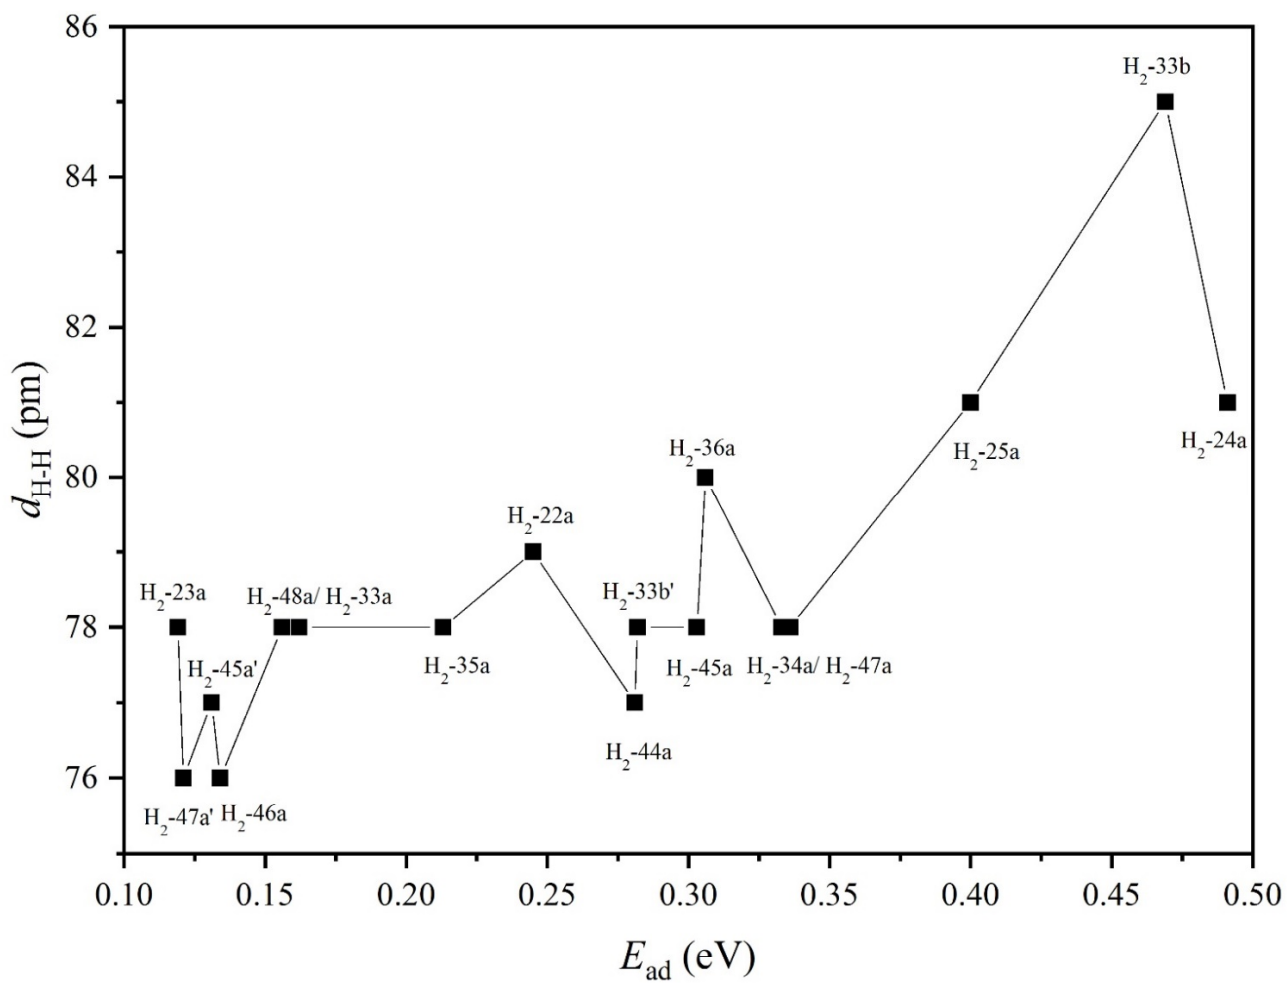

**Figure S6.** Relationship between adsorption energy ( $E_{ad}$ ) and H-H bond length ( $d_{H-H}$ ) for H<sub>2</sub>...Mo<sub>x</sub>S<sub>y</sub> clusters.

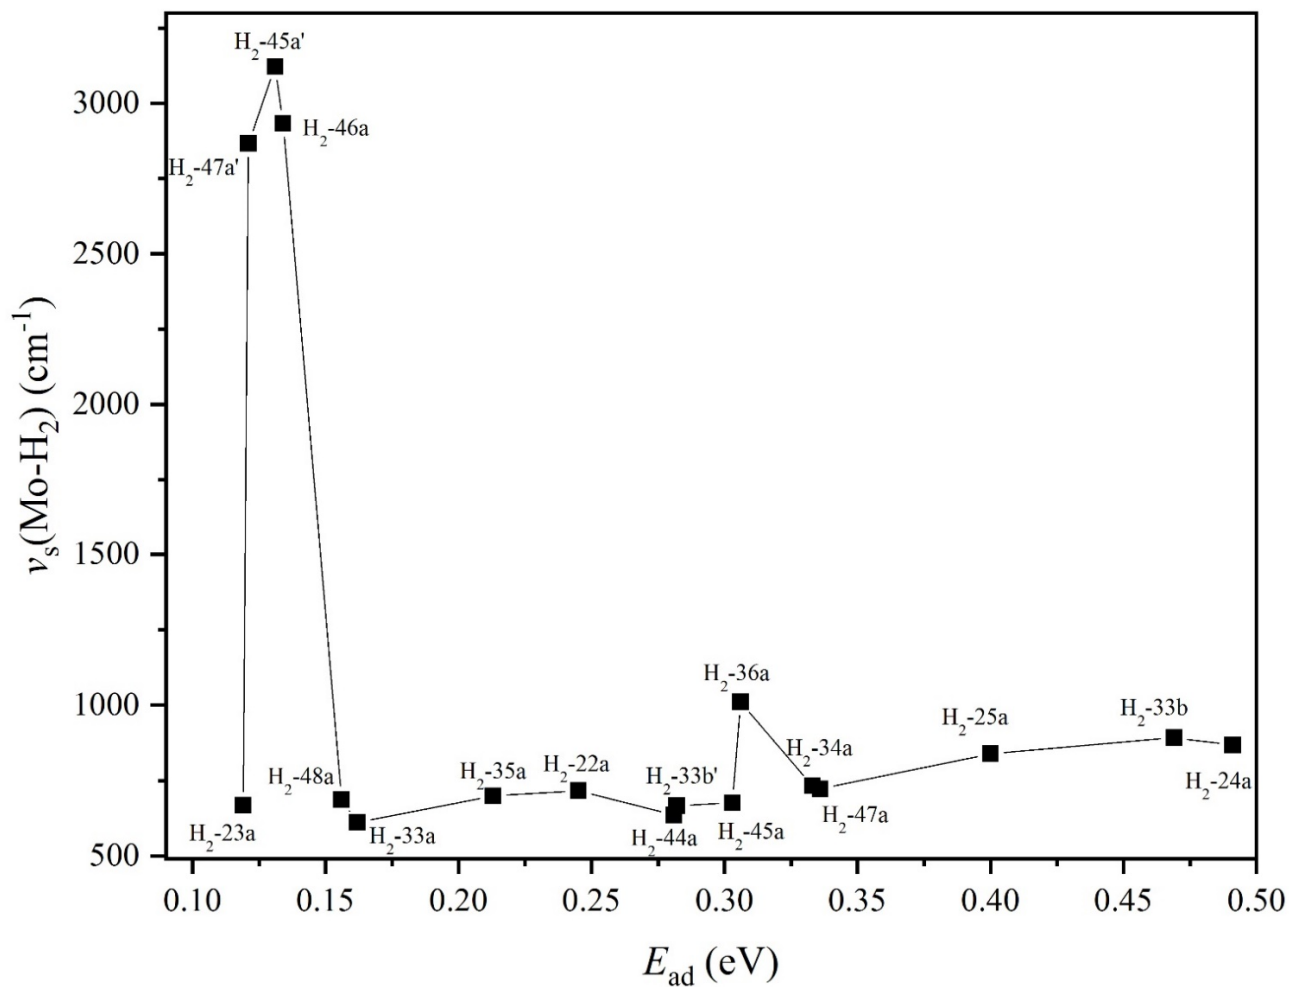

**Figure S7.** Relationship between adsorption energy ( $E_{ad}$ ) and symmetric H<sub>2</sub>-Mo vibration ( $\nu_s(\text{Mo-H}_2)$ ) for H<sub>2</sub>...Mo<sub>x</sub>S<sub>y</sub> clusters.

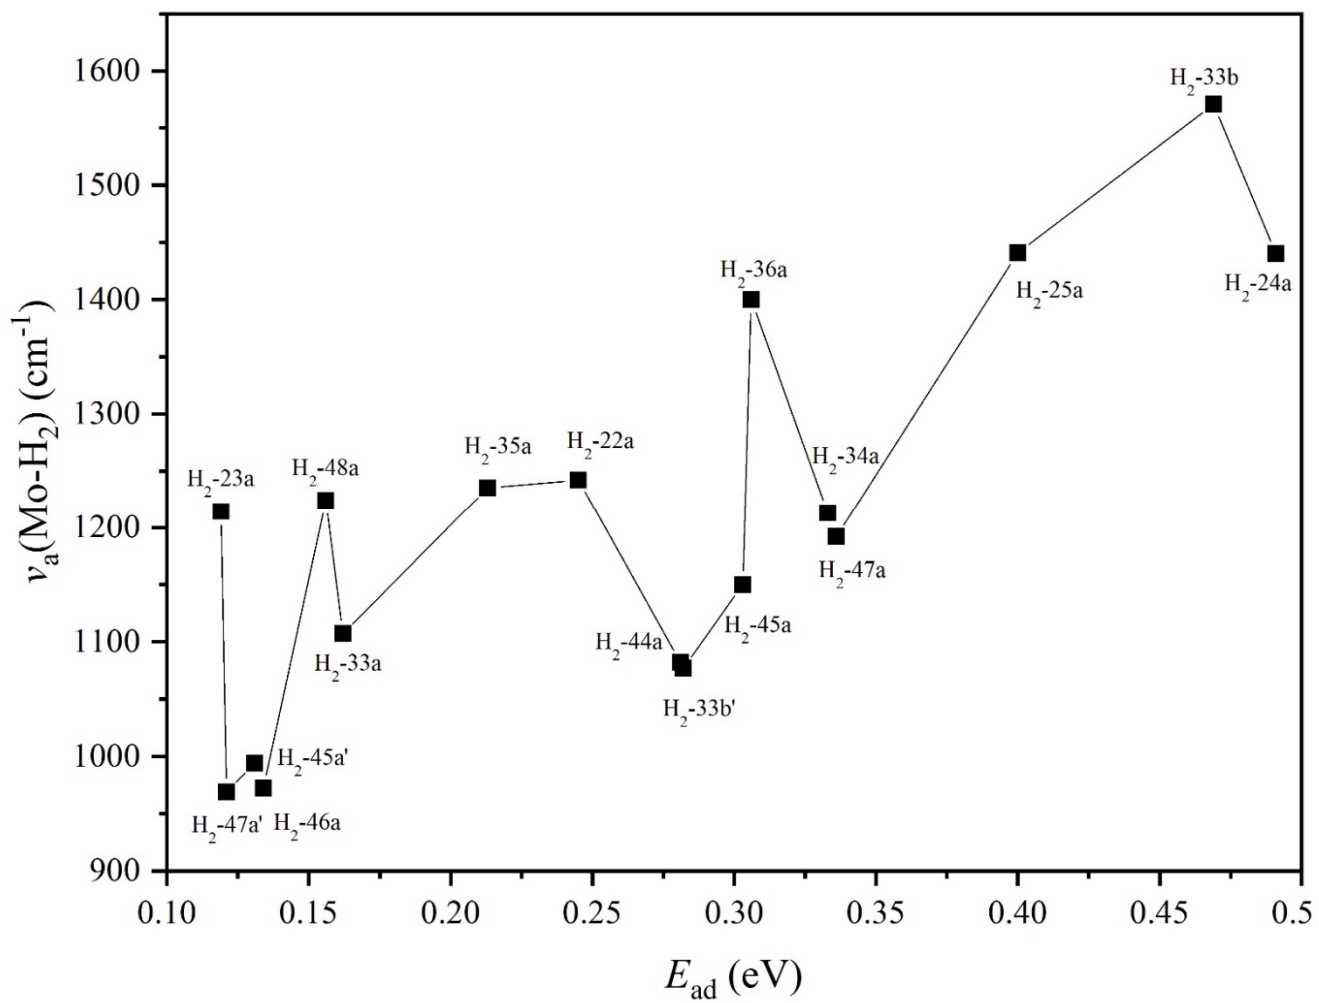

**Figure S8.** Relationship between adsorption energy ( $E_{ad}$ ) and asymmetric H<sub>2</sub>-Mo vibration ( $\nu_a(\text{Mo-H}_2)$ ) for H<sub>2</sub>...Mo<sub>x</sub>S<sub>y</sub> clusters.

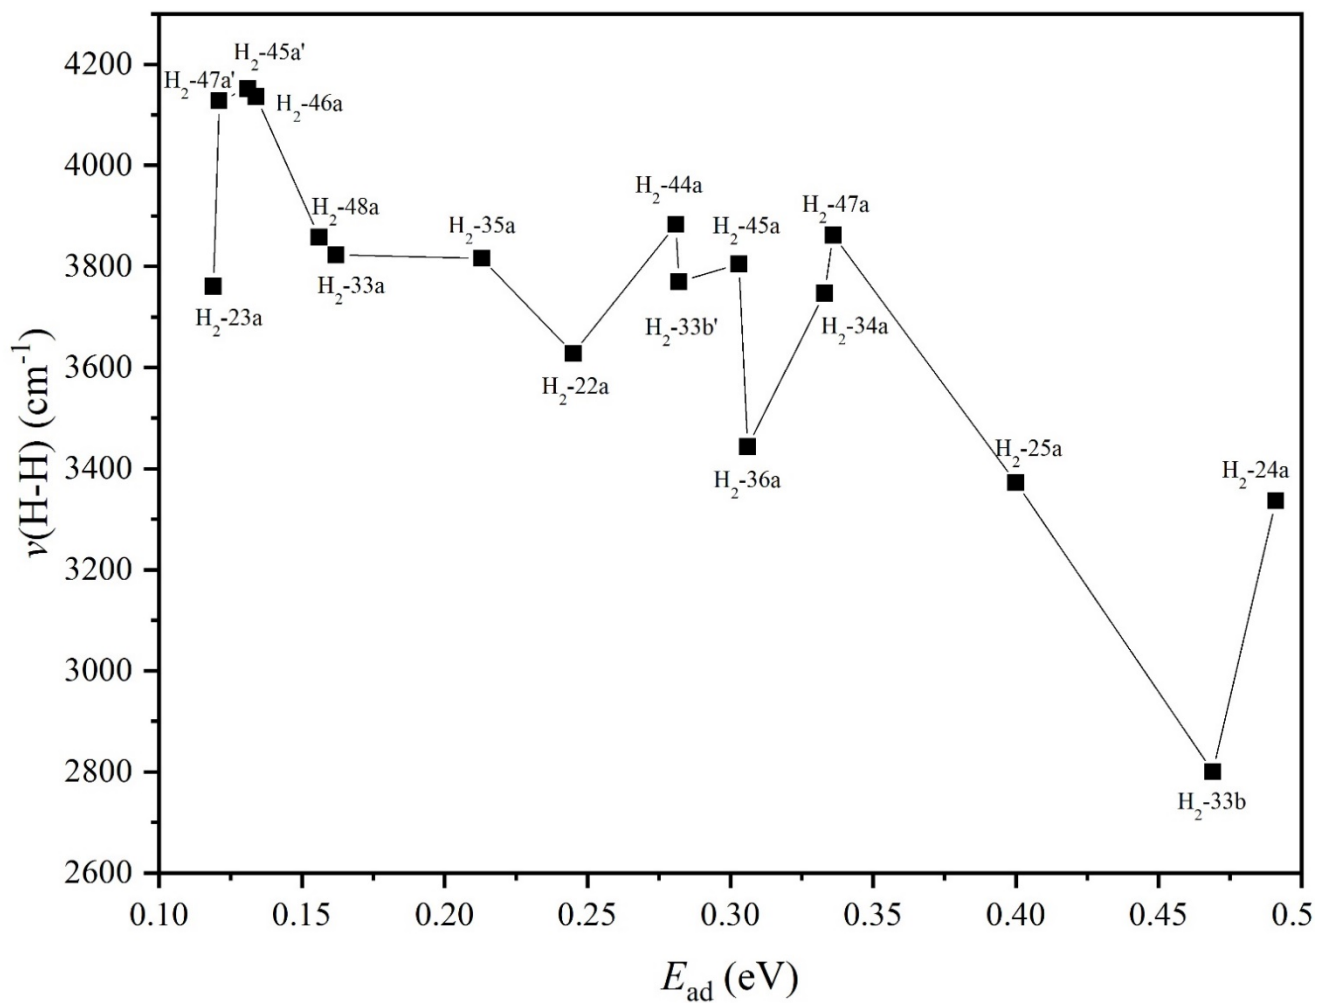

**Figure S9.** Relationship between adsorption energy ( $E_{ad}$ ) and H-H vibration ( $\nu(\text{H-H})$ ) for H<sub>2</sub>...Mo<sub>x</sub>S<sub>y</sub> clusters.

### Calculations on two-dimensional molybdenum sulfide monolayer with grid structure

We performed DFT calculations on the two-dimensional grid structure using Vienna Ab initio Simulation Package (VASP).<sup>1,2</sup> The Perdew-Burke-Ernzerhof (PBE) generalized gradient approximation (GGA) functional with the projector augmented-wave method<sup>3-5</sup> was used and all calculations were performed in a spin unrestricted manner. The square grid with two Mo and two S atoms is chosen as the unit cell to build the periodic two-dimensional slab along a and b directions (Figure S7), and a vacuum of about 15 Å is added between two slabs to eliminate the interactions between repeated slabs. The energy cutoff for the plane-wave basis expansion was chosen to be 500 eV. We sampled  $6 \times 6 \times 1$  k-point grid for the integration of the Brillouin zone for the optimization and frequency calculations.

The optimized lattice constant is 374 pm, corresponding to the Mo-Mo distances as 265 pm, which is close to that in our calculations for clusters (280 pm). Zone centered ( $\Gamma$ -point) vibrational frequencies are calculated for the optimized structures. Nine positive frequencies ranging from 142 to 417  $\text{cm}^{-1}$  have been obtained, with three negligible virtual frequencies whose absolute values are less than 1  $\text{cm}^{-1}$ , which indicates that this type of grid structure has structural stability.

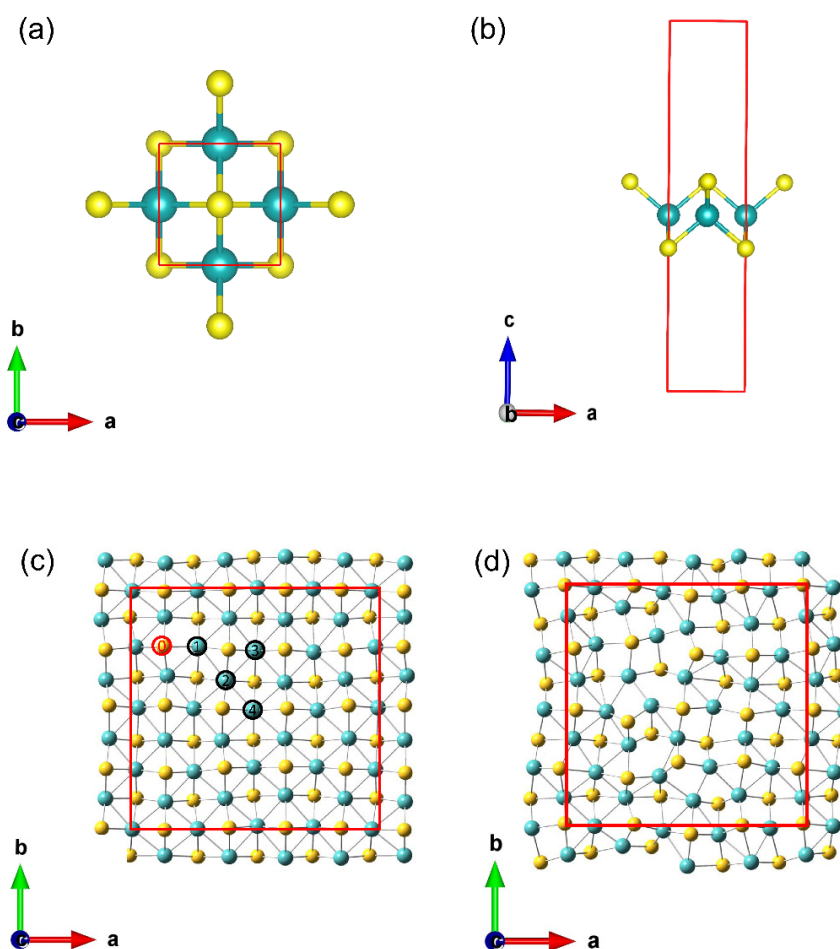

**Figure S10.** Structures of molybdenum-sulfur single layer slab. Top view (a) and side view (b) after optimization. The last frame of the molecular dynamics simulation under 300 K (c) and 1200 K (d).

*Ab initio* molecular dynamics (AIMD) simulations are conducted with the unit cell  $4 \times 4 \times 1$  times of the unit cell in the optimization calculations. To make AIMD calculations computationally efficient, we used a low cutoff of 250 eV, and the k-point sampling was restricted to the  $\Gamma$  point only. Normal precision in VASP was used with a tolerance of  $1 \times 10^{-5}$  eV for energy convergence in the SCF cycle. The time step is set to 1.0 fs and total time is 10 ps. MD simulations are carried out at 300, 500, 800, 1000, and 1200 K with the NVT ensemble. The structure remains unchanged at low temperature (300 K, Figure S7 c), while at high temperature, it is distorted (1200 K, Figure S7 d), indicating that the structure will be unstable at high temperature. The energy variation is quite small at low temperatures while it becomes large at high temperatures (Figure S8). We examined the radial distribution function of Mo-S distances at different temperatures (Figure S9). At 300 K, it clear that there are four peaks, corresponding to the distances for (S, Mo) pair (0, 1), (0, 2), (0, 3), and (0, 4) (labelled in Figure S7 c), respectively. As temperature increases, these peaks height decreases and their width increases, indicating that the regular structure is gradually broken. The root mean square deviation (RMSD) with respect to the optimized structure was also analysed. RMSD is defined as  $RMSD(N; x, y) = \sqrt{(\sum_{i=1}^N \|x_i - y_i\|^2)/N}$ , in which  $N$  is the atom number in the unit cell;  $x_i$  and  $y_i$  are the Cartesian coordinates of the  $i^{\text{th}}$  atom of frame  $x$  and the optimized structure  $y$ , respectively. The values of RMSD (Figure S10) are quite small ( $\sim 0.2$  Å) and steady at 300 K, while they could be large ( $\sim 0.5$  Å) and oscillate obviously at 1200 K. This further confirms that the two-dimensional grid structure is stable under room temperature.

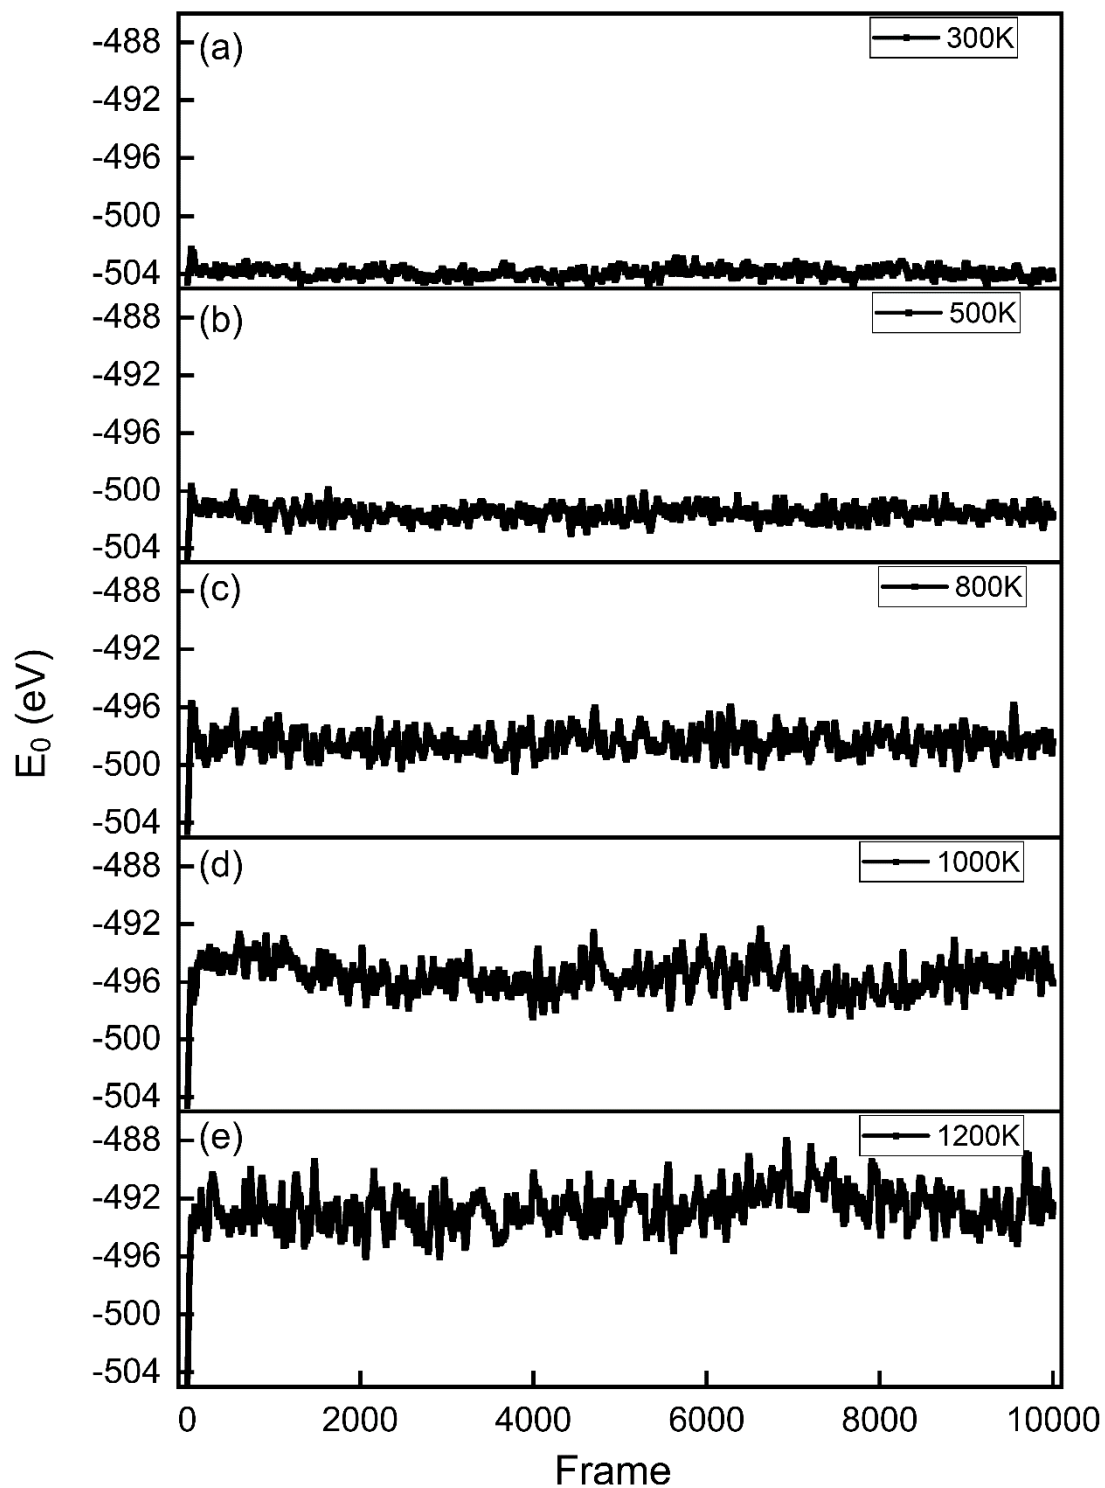

**Figure S11.** The energy variation of the 10000 frames under (a) 300, (b) 500, (c) 800, (d) 1000, and (e) 1200 K, respectively.

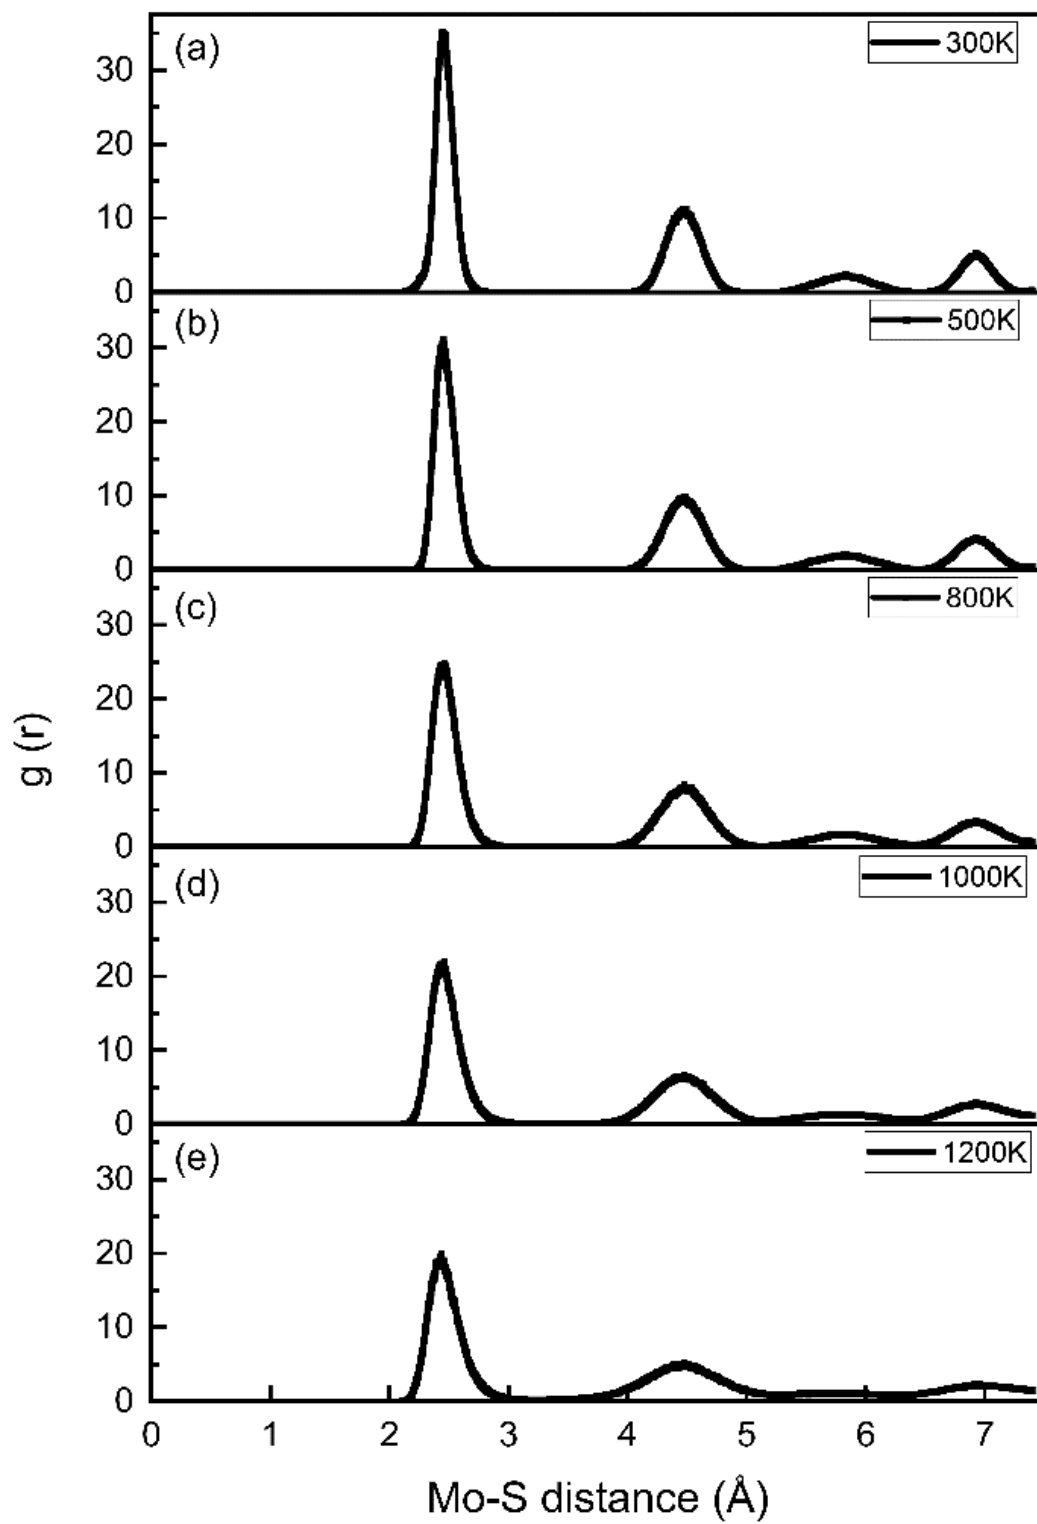

**Figure S12.** The radial distribution function  $g(r)$  of the 10000 frames under (a) 300, (b) 500, (c) 800, (d) 1000, and (e) 1200 K, respectively.



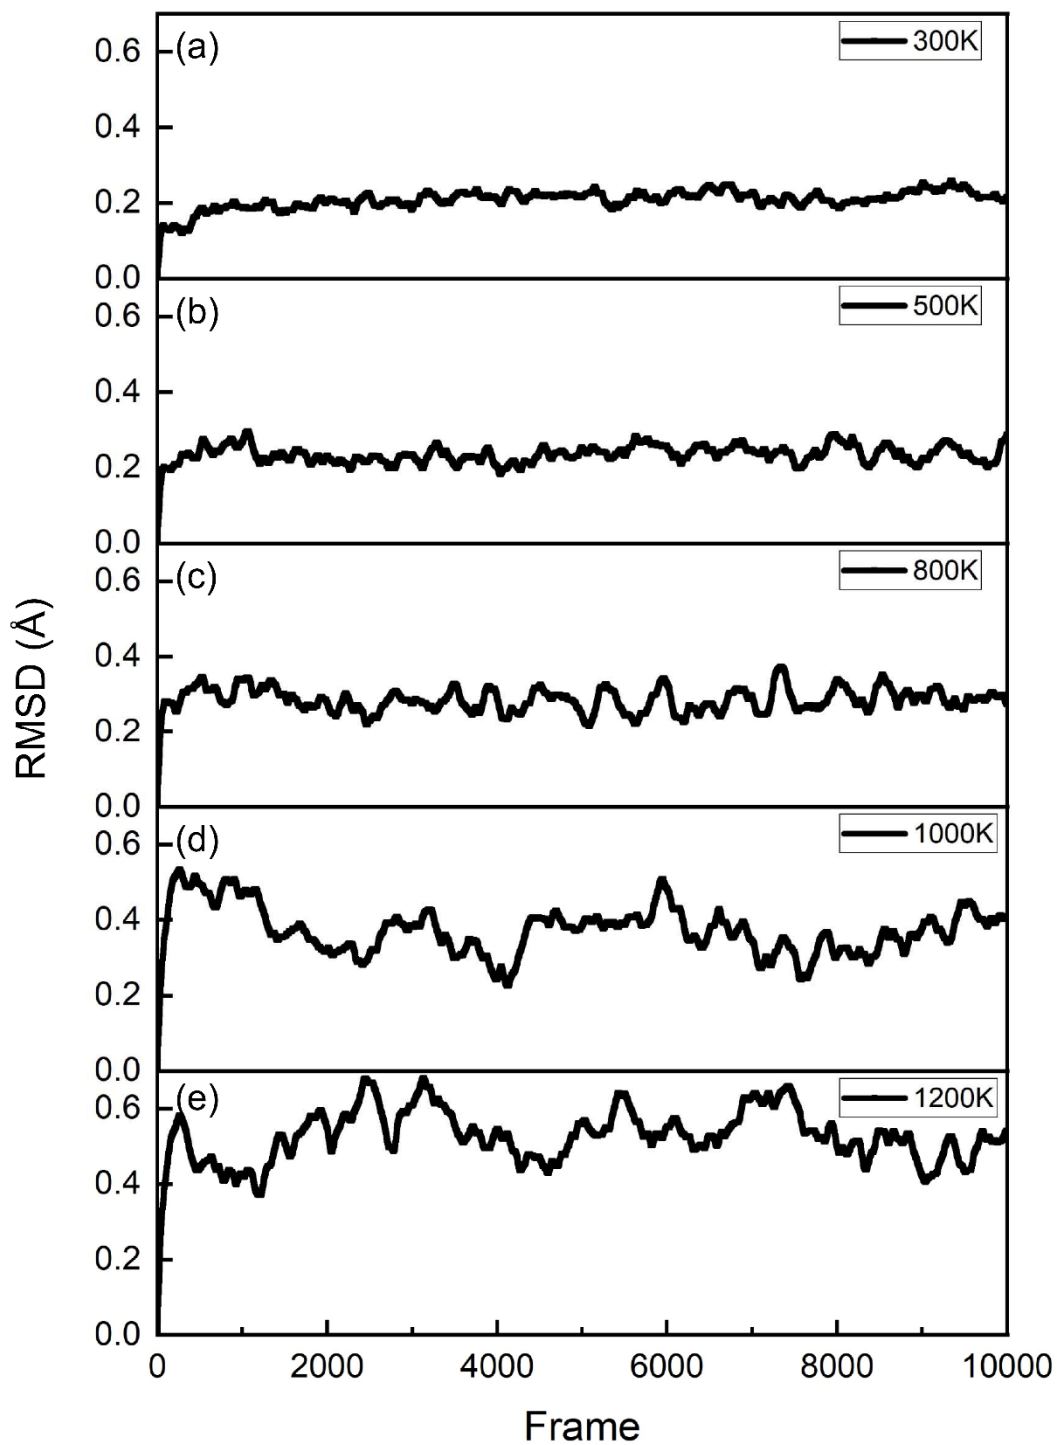

**Figure S13.** The root mean square deviation of the 10000 frames under (a) 300, (b) 500, (c) 800, (d) 1000, and (e) 1200 K, respectively.

### References

- 1 G. Kresse and J. Furthmüller, *Comp. Mater. Sci.*, 1996, **6**, 15.
- 2 G. Kresse and J. Furthmüller, *Phys. Rev. B*, 1996, **54**, 11169.
- 3 G. Kresse and D. Joubert, *Phys. Rev. B*, 1999, **59**, 1758.
- 4 J. P. Perdew, K. Burke and M. Ernzerhof, *Phys. Rev. Lett.*, 1996, **77**, 3865.
- 5 P. E. Blöchl, *Phys. Rev. B*, 1994, **50**, 17953.
